# Supplementary material for: Efficient Removal of Cu(II), Zn(II), and Cd(II) from Aqueous Solutions by a Mineral-Rich Biochar Derived from a Spent Mushroom (Agaricus bisporus) Substrate
Source: PubMed Central journal article supplement (PMC7794708; doi:10.3390/ma14010035), 2020-12-23
Supplement: materials-14-00035-s001.pdf [file materials-14-00035-s001.pdf]

# Efficient Removal of Cu(II), Zn(II), and Cd(II) from Aqueous Solutions by a Mineral-Rich Biochar Derived from a Spent Mushroom (*Agaricus bisporus*) Substrate

Guosheng Zhang <sup>1</sup>, Na Liu <sup>1</sup>, Yuan Luo <sup>1</sup>, Haibo Zhang <sup>1</sup>, Long Su <sup>1</sup>, Kokyo OH <sup>2</sup> and Hongyan Cheng <sup>1,\*</sup>

<sup>1</sup> College of Resources and Environment, Shanxi Agricultural University, Taigu 030801, China; zhanggs@stu.sxau.edu.cn (G.Z.); liuna@sxau.edu.cn (N.L.); luoyuan@sxau.edu.cn (Y.L.); zhanghb@sxau.edu.cn (H.Z.); sulong@stu.sxau.edu.cn (L.S.)

<sup>2</sup> Center for Environmental Science in Saitama, Kazo City, Saitama 347-0115, Japan; peace6728@yahoo.co.jp

\* Correspondence: sxauchenghy@sxau.edu.cn

## Supplementary Materials and Method

### Mathematical Models for Adsorption Kinetics and Isotherm

The adsorption capacity of spent *Agaricus bisporus* substrate biochar was calculated according to Equation (1):

$$Q_e = (C_0 - C_e) \cdot \frac{V}{m} \quad (1)$$

where  $Q_e$  ( $\text{mg} \cdot \text{g}^{-1}$ ) is the adsorption capacity of biochar at equilibrium;  $V$  (L) is the solution volume;  $C_0$  ( $\text{mg} \cdot \text{L}^{-1}$ ) is the initial heavy metal (Cd(II) or Cu(II) or Zn(II)) concentration;  $C_e$  is the Cd(II) or Cu(II) or Zn(II) concentration after time adsorption, and  $m$  (g) is the weight of biochar samples.

The kinetics of Cd(II) or Cu(II) or Zn(II) sorption were fitted to the pseudo-first order (PF-order model, Equation (2)), pseudo-second order (PS-order model, Equation (3))

$$Q_t = Q_e (1 - e^{-k_1 t}) \quad (2)$$

$$Q_t = \frac{k_2 Q_e^2 t}{1 + k_2 Q_e t} \quad (3)$$

where  $Q_t$  ( $\text{mg} \cdot \text{g}^{-1}$ ) is the sorbed amount at time  $t$ ;  $k_1$  ( $\text{h}^{-1}$ ) and  $k_2$  ( $\text{g} \cdot \text{mg}^{-1} \cdot \text{h}^{-1}$ ) are the apparent first-order and second-order sorption rate constants, respectively.

The Freundlich isotherm model (Equation (4)) and Langmuir isotherm model (Equation (5)) was used to simulate Cd or Cu or Zn sorption to biochars,

$$Q_e = k_F C_e^n \quad (4)$$

$$Q_e = \frac{Q_{\max} k_L C_e}{1 + k_L C_e} \quad (5)$$

$Q_{\max}$  ( $\text{mg} \cdot \text{g}^{-1}$ ) is the maximum adsorption capacity;  $k_L$  ( $\text{L} \cdot \text{mg}^{-1}$ ) is the Langmuir constant related to the adsorption affinity;  $k_f$  ( $\text{mg} \cdot \text{g}^{-1}$ ) is

the Freundlich constant related to the adsorption capacity; n is the adsorption strength.

**Table S1.** The concentrations of metals in biochars derived from spent *Agaricus Bisporus* substrate.

| Biochar | Fe    | Mn    | Al    | Zn<br>(mg·g <sup>-1</sup> ) | Cu    | Cd  | Pb    |
|---------|-------|-------|-------|-----------------------------|-------|-----|-------|
| SAS350  | 3.233 | 0.167 | 14.60 | 0.165                       | 0.042 | N.D | 0.014 |
| SAS450  | 3.173 | 0.165 | 15.91 | 0.146                       | 0.039 | N.D | 0.009 |
| SAS550  | 2.997 | 0.159 | 16.13 | 0.145                       | 0.037 | N.D | 0.007 |
| SAS650  | 3.270 | 0.163 | 16.49 | 0.140                       | 0.036 | N.D | 0.004 |
| SAS750  | 3.434 | 0.163 | 17.32 | 0.135                       | 0.034 | N.D | 0.003 |

SAS350-SAS750 were the biochars derived from spent *Agaricus bisporus* substrate (SAS) at 350–750 °C. N.D.: Not detected (below the detection limit).

**Table S2.** Pseudo-first (PF) order and pseudo-second (PS) order model parameters for the Cu(II) or Zn(II) or Cd(II) sorption onto SAS-derived biochars produced at 350, 550, and 750 °C.

| Biochars | PF Order Model              |                            |                | PS Order Model              |                                             |                |       |
|----------|-----------------------------|----------------------------|----------------|-----------------------------|---------------------------------------------|----------------|-------|
|          | $Q_e$ (mg·g <sup>-1</sup> ) | $k_1$ (1 h <sup>-1</sup> ) | R <sup>2</sup> | $Q_e$ (mg·g <sup>-1</sup> ) | $k_2$ (g mg <sup>-1</sup> h <sup>-1</sup> ) | R <sup>2</sup> |       |
| Cu       | SAS350                      | 28.6 ± 0.98                | 0.691 ± 0.098  | 0.963                       | 30.4 ± 0.84                                 | 0.033 ± 0.005  | 0.980 |
|          | SAS550                      | 16.0 ± 0.38                | 1.61 ± 0.164   | 0.974                       | 16.9 ± 0.11                                 | 0.141 ± 0.006  | 0.998 |
|          | SAS750                      | 65.2 ± 2.54                | 0.547 ± 0.080  | 0.956                       | 70.3 ± 1.82                                 | 0.010 ± 0.001  | 0.985 |
| Zn       | SAS350                      | 21.2 ± 0.81                | 0.987 ± 0.149  | 0.951                       | 22.7 ± 0.46                                 | 0.059 ± 0.006  | 0.988 |
|          | SAS550                      | 10.9 ± 0.53                | 1.55 ± 0.355   | 0.911                       | 11.7 ± 0.34                                 | 0.171 ± 0.030  | 0.973 |
|          | SAS750                      | 52.4 ± 1.20                | 0.208 ± 0.017  | 0.990                       | 59.2 ± 0.70                                 | 0.004 ± 0.001  | 0.998 |
| Cd       | SAS350                      | 29.6 ± 0.81                | 0.308 ± 0.036  | 0.972                       | 32.7 ± 0.60                                 | 0.013 ± 0.001  | 0.992 |
|          | SAS550                      | 12.9 ± 0.49                | 0.765 ± 0.147  | 0.913                       | 13.47 ± 0.35                                | 0.080 ± 0.013  | 0.971 |
|          | SAS750                      | 62.3 ± 1.89                | 0.524 ± 0.074  | 0.956                       | 66.72 ± 1.23                                | 0.012 ± 0.001  | 0.988 |

**Table S3.** Langmuir and Freundlich isotherm parameters for Cu(II) or Zn(II) or Cd(II) sorption onto SAS-derived biochars produced at 350, 550, and 750 °C.

| Biochars | Langmuir Model              |                             |                | Freundlich Model                                              |              |                |       |
|----------|-----------------------------|-----------------------------|----------------|---------------------------------------------------------------|--------------|----------------|-------|
|          | $Q_e$ (mg·g <sup>-1</sup> ) | $K_L$ (mg L <sup>-1</sup> ) | R <sup>2</sup> | $K_F$<br>(mg <sup>1-n</sup> g <sup>-1</sup> L <sup>-n</sup> ) | $n$          | R <sup>2</sup> |       |
| Cu       | SAS350                      | 28.9 ± 2.11                 | 0.150 ± 0.058  | 0.927                                                         | 8.27 ± 0.46  | 3.623 ± 0.181  | 0.995 |
|          | SAS550                      | 11.6 ± 0.92                 | 2.089 ± 1.39   | 0.860                                                         | 6.37 ± 0.37  | 6.509 ± 0.618  | 0.986 |
|          | SAS750                      | 68.1 ± 4.85                 | 0.640 ± 0.339  | 0.890                                                         | 37.3 ± 1.73  | 7.001 ± 0.601  | 0.987 |
| Zn       | SAS350                      | 25.6 ± 1.82                 | 0.138 ± 0.045  | 0.954                                                         | 6.64 ± 0.27  | 3.276 ± 0.114  | 0.998 |
|          | SAS550                      | 16.9 ± 1.79                 | 0.034 ± 0.010  | 0.970                                                         | 1.82 ± 0.14  | 2.293 ± 0.100  | 0.996 |
|          | SAS750                      | 55.2 ± 4.90                 | 0.389 ± 0.274  | 0.838                                                         | 29.6 ± 0.65  | 7.180 ± 0.288  | 0.998 |
| Cd       | SAS350                      | 47.2 ± 3.12                 | 0.035 ± 0.008  | 0.963                                                         | 7.66 ± 0.58  | 3.044 ± 0.152  | 0.993 |
|          | SAS550                      | 17.2 ± 1.36                 | 0.072 ± 0.031  | 0.896                                                         | 6.02 ± 0.46  | 5.289 ± 0.459  | 0.985 |
|          | SAS750                      | 64.8 ± 2.82                 | 2.59 ± 0.97    | 0.930                                                         | 37.20 ± 2.07 | 7.501 ± 0.750  | 0.977 |

**Table S4.** Comparison of SASC adsorption capacity of Cd(II), Cu(II) and Zn(II) with other biochar.

| Metal | Feedstock                                | Experiment Conditions |            |                                | Sorbent Dosage<br>(g·L <sup>-1</sup> ) | $Q_{max}$ (mg·g <sup>-1</sup> ) | Reference     |
|-------|------------------------------------------|-----------------------|------------|--------------------------------|----------------------------------------|---------------------------------|---------------|
|       |                                          | Pyrolysis Temperature | Initial pH | $C_0$<br>(mg·L <sup>-1</sup> ) |                                        |                                 |               |
| Cu    | Spent <i>Agaricus bisporus</i> substrate | 750                   | 5          | 0–250                          | 1                                      | 68.1                            | Current study |
|       | Jarrah                                   | 700                   | 5.5        | 0–193                          | 1.25                                   | 4.39                            | 1             |
|       | Corn straw                               | 800                   | -          | -                              | -                                      | 25.6                            | 2             |
|       | Algae-dairy-manure                       | 600                   | 6          | 5–300                          | 2                                      | 14.83                           | 3             |
|       | Cattle manure                            | 500                   | 2          | 2–50                           | 5                                      | 44.50                           | 4             |
|       | Cauliflower leaves                       | 600                   | -          | 50–200                         | 2.5                                    | 53.96                           | 5             |

|    |                                   |     |   |         |      |       |               |
|----|-----------------------------------|-----|---|---------|------|-------|---------------|
|    | corn straw                        | 600 | 5 | 6-318   | 5    | 12.52 | 6             |
| Zn | Spent Agaricus bisporus substrate | 750 | 5 | 0-250   | 1    | 55.2  | Current study |
|    | Rice straw                        | 550 | 5 | 0-65    | 1.25 | 39.69 | 7             |
|    | Chicken manure                    | 550 | 5 | 0-65    | 1.25 | 11.24 | 7             |
|    | Sewage sludge                     | 550 | 5 | 0-65    | 1.25 | 4.25  | 7             |
|    | Jarrah                            | 700 | 5 | 0-327   | 5    | 2.31  | 1             |
| Cd | Spent Agaricus bisporus substrate | 750 | 5 | 0-250   | 1    | 64.8  | Current study |
|    | Bamboo                            | 700 | 5 | 2-300   | 1    | 76.18 | 8             |
|    | Pine needle                       | 600 | 6 | 2.5-360 | 2    | 53.8  | 9             |
|    | Municipal sewage sludge           | 550 | 7 | 10-50   | 5    | 41.67 | 10            |

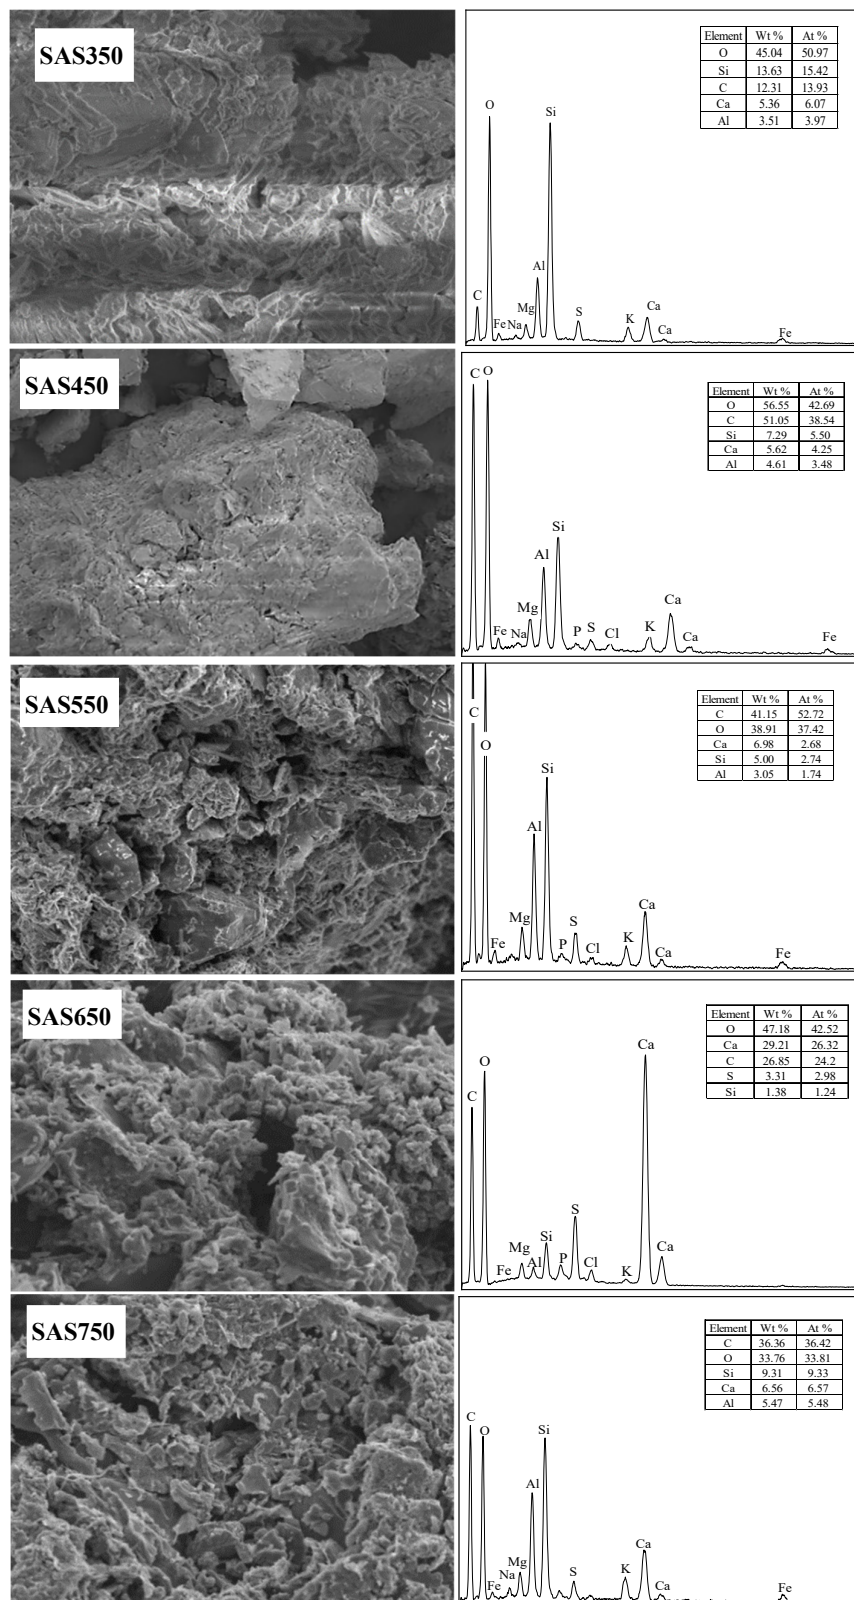

**Figure S1.** The SEM images (3000×) and corresponding EDS spectra of spent *Agaricus bisporus* derived biochars at 350–750 °C. SAS300–SAS700 were the biochars at 350–750 °C.

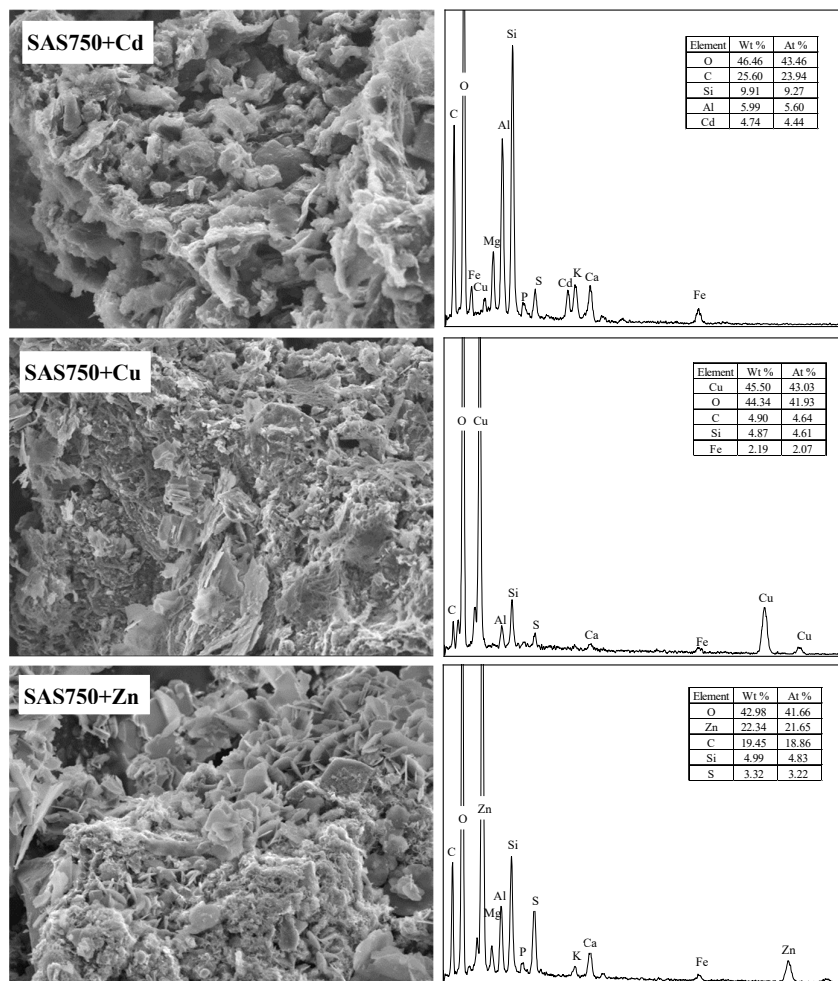

**Figure S2.** The SEM images (3000×) and corresponding EDS spectra of spent *Agaricus bisporus* derived biochars after adsorption of Cd(II), Cu(II) and Zn(II) at 750 °C.

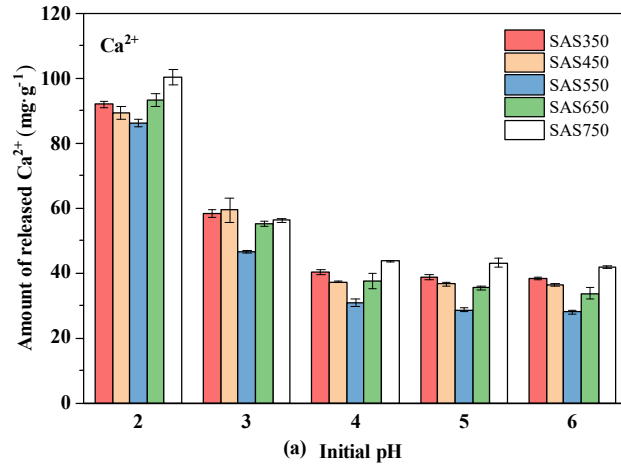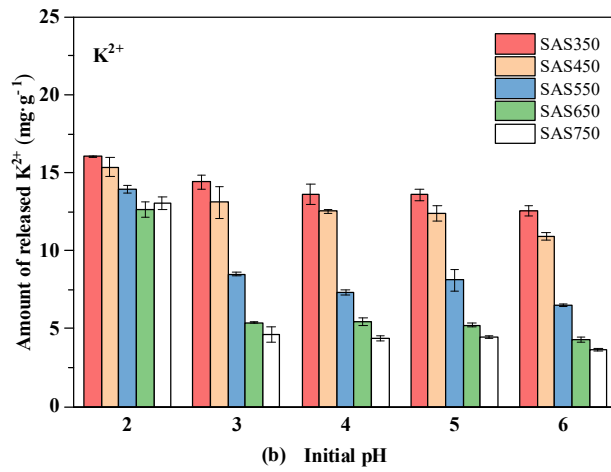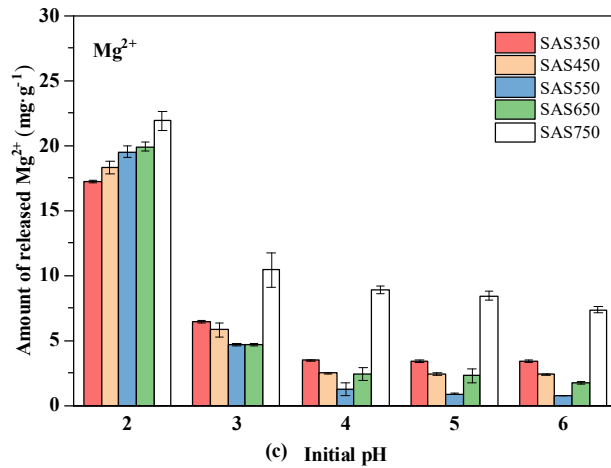

**Figure S3.** The amount of Ca<sup>2+</sup> (a), K<sup>+</sup> (b) and Mg<sup>2+</sup> (c) released from SABCs into solution after Zn(II) adsorption at different initial pH values. (pH of 5, 24 h, initial concentration of 100 mg·L<sup>-1</sup> and adsorbent dosage of 1 g·L<sup>-1</sup>).

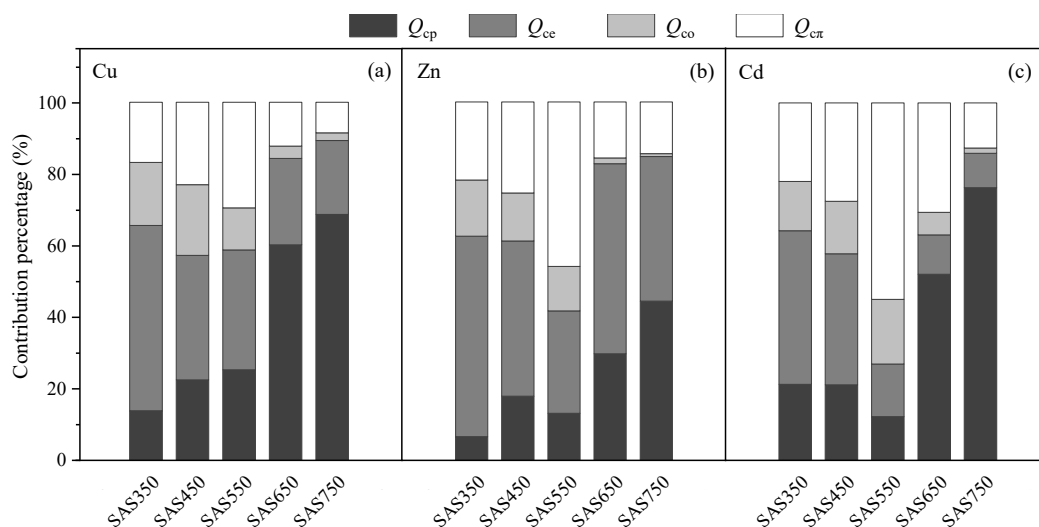

**Figure 4.** The contribution percentage of different mechanisms to Cu(II) (a), Zn(II) (b) and Cd(II) (c) sorption on SASCs. (pH of 5, 24 h, initial concentration of  $100 \text{ mg}\cdot\text{L}^{-1}$  and adsorbent dosage of  $1 \text{ g}\cdot\text{L}^{-1}$ ).

## References

- Jiang, S.; Huang, L.; Nguyen, T. A. H.; Ok, Y. S.; Rudolph, V.; Yang, H.; Zhang, D. Copper and zinc adsorption by softwood and hardwood biochars under elevated sulphate-induced salinity and acidic pH conditions. *Chemosphere* **2016**, *142*, 64–71.
- Yu, W.; Lian, F.; Cui, G.; Liu, Z. N-doping effectively enhances the adsorption capacity of biochar for heavy metal ions from aqueous solution. *Chemosphere* **2018**, *193*, 8–16.
- Jin, H.; Hanif, M. U.; Capareda, S.; Chang, Z.; Huang, H.; Ai, Y. Copper(II) removal potential from aqueous solution by pyrolysis biochar derived from anaerobically digested algae-dairy-manure and effect of KOH activation. *Journal of Environmental Chemical Engineering* **2016**, *4*, 365–372.
- Idrees, M.; Batool, S.; Kalsoom, T.; Yasmeen, S.; Kalsoom, A.; Raina, S.; Zhuang, Q.; Kong, J. Animal manure-derived biochars produced via fast pyrolysis for the removal of divalent copper from aqueous media. *Journal of Environmental Management* **2018**, *213*, 109–118.
- Ahmad, Z.; Gao, B.; Mosa, A.; Yu, H.; Yin, X.; Bashir, A.; Ghoveisi, H.; Wang, S. Removal of Cu(II), Cd(II) and Pb(II) ions from aqueous solutions by biochars derived from potassium-rich biomass. *Journal of Cleaner Production* **2018**, *180*, 437–449.
- Chen, X.; Chen, G.; Chen, L.; Chen, Y.; Lehmann, J.; McBride, M. B.; Hay, A. G. Adsorption of copper and zinc by biochars produced from pyrolysis of hardwood and corn straw in aqueous solution. *Bioresour Technol* **2011**, *102*, 8877–8884.
- Zhao, M.; Dai, Y.; Zhang, M.; Feng, C.; Qin, B.; Zhang, W.; Zhao, N.; Li, Y.; Ni, Z.; Xu, Z.; Tsang, D. C. W.; Qiu, R. Mechanisms of Pb and/or Zn adsorption by different biochars: Biochar characteristics, stability, and binding energies. *Science of The Total Environment* **2020**, *717*, 136894.
- Wang, R. Z.; Huang, D. L.; Liu, Y. G.; Zhang, C.; Lai, C.; Zeng, G. M.; Cheng, M.; Gong, X. M.; Wan, J.; Luo, H. Investigating the adsorption behavior and the relative distribution of Cd(2+) sorption mechanisms on biochars by different feedstock. *Bioresour Technol* **2018**, *261*, 265–271.
- Park, J.-H.; Wang, J. J.; Kim, S.-H.; Kang, S.-W.; Jeong, C. Y.; Jeon, J.-R.; Park, K. H.; Cho, J.-S.; Delaune, R. D.; Seo, D.-C. Cadmium adsorption characteristics of biochars derived using various pine tree residues and pyrolysis temperatures. *Journal of Colloid and Interface Science* **2019**, *553*, 298–307.
- Chen, T.; Zhou, Z.; Han, R.; Meng, R.; Wang, H.; Lu, W. Adsorption of cadmium by biochar derived from municipal sewage sludge: Impact factors and adsorption mechanism. *Chemosphere* **2015**, *134*, 286–293.
